# Supplementary material for: An Exposure-Wide and Mendelian Randomization Approach to Identifying Modifiable Factors for the Prevention of Depression
Source: Atypon-hosted journal article supplement (doi:10.1176/appi.ajp.2020.19111158), 2020-08-14
Supplement: appi.ajp.2020.19111158suppl_methods_and_group_affliations.pdf [file appi.ajp.2020.19111158suppl_methods_and_group_affliations.pdf]

## **SUPPLEMENTARY METHODS**

### **Distinctions From Previous UK Biobank Studies of Depression**

A number of recent studies have examined depression in the UK Biobank, including a GWAS of various depression phenotypes (Howard et al., 2018), genome-wide gene-environment analyses of depression in the context of trauma exposure (Coleman et al., 2020), and a phenome-wide association study examining relationships between depression PRS and a wide range of mental health/behavioral/imaging traits in the database, with accompanying Mendelian randomization analyses (Shen et al., 2020). This study is distinct from previous work in notable ways, including its: (1) specific focus on identifying and testing *modifiable* factors associated with depression, rather than comorbidities and related traits/outcomes; (2) *prospective* examination of observational associations between modifiable factors and clinically significant depression among individuals who did not appear actively depressed at baseline; and (3) testing the effects of modifiable factors on depression *even among individuals at high polygenic risk*, rather than examining polygenic or genome-wide relationships of depression with other traits of interest. No study to our knowledge—in the UK Biobank or beyond—has reported these phenotypic and/or MR results to answer our set of prevention-oriented empirical questions.

### **Genomic Quality Control**

We performed quality control on the genomic data based on metrics provided by the UK Biobank<sup>1</sup>. Specifically, we removed participants who were outliers for heterozygosity or data

missingness, had putative sex chromosome aneuploidy, or were excluded from kinship inference. We also randomly removed one of each pair of subjects who were identified as third-degree relatives or closer. We retained participants with white British ancestry whose genomic data were used in autosome phasing and whose self-reported sex matched their genetically inferred sex. This resulted in an initial sample of 123,794 individuals of white British ancestry with high-quality genomic data in BGEN format.

## **Further Description of Variables**

### **A. Depression**

Baseline depression symptoms were measured via two Likert-scale items adapted from the PHQ-2 on depressed mood and anhedonia (response options ranging from “not at all” to “nearly every day”). Participants who positively endorsed at least one of these items at the level of “more than half the days” or higher were considered to have elevated depressive symptoms at baseline.

### **B. Reported traumatic life events**

Exposure to childhood trauma was measured using items from a short form of the Childhood Trauma Questionnaire<sup>2</sup>, of which three items pertaining to childhood physical, sexual, and emotional abuse were available. Each item was rated on a five-point Likert scale ranging from “never true” to “very often true.” Correspondingly, three items measuring exposure to partner-based physical, sexual, and emotional abuse, respectively, had been developed for the UK Biobank study on a similar severity scale as childhood trauma. Finally, four items assessed other lifetime traumatic events (i.e., exposure to sexual assault, physically violent crime,

serious/life-threatening accident, and witnessing sudden violent death), and were coded as binary based on endorsed exposure at any point prior to follow-up.

### **C. Covariates**

We extracted baseline variables on participant characteristics (i.e., participant sex, age, assessment center), sociodemographic factors (i.e., socioeconomic deprivation, employment status, household income, completion of higher education, urbanicity, household size), and health factors (i.e., BMI, and physical illness/disability). Specifically, socioeconomic deprivation was indexed using the Townsend deprivation index, calculated based on the national census output area in which participants' zip codes (at recruitment) are located. Household income was assessed average pre-tax total household income, with five options ranging from <18K to >100K. Individuals reported their educational qualifications and we derived a binary variable indicating completion of higher education (i.e., college or university-level degree) as in previous research (Davies et al., 2016). Urbanicity was classified based on whether participant was coded as living in an urban area of England/Wales or Scotland versus not, based on the home postal code matched to the 2001 census from the Office of National Statistics. Similarly, we derived a binary variable indicating current employment status, i.e., whether individuals positively endorsed paid employment or self-employment, and a binary variable indicating physical illness/disability, i.e., if individuals positively endorsed having any longstanding illness, disability, or infirmity. These variables were selected for inclusion as covariates as they could potentially bias the observed relationship between modifiable factors and depression (e.g., socioeconomic deprivation, urbanicity, or higher educational attainment may shape physical activity, diet, or media use patterns while also influencing depression risk), and were thus used to assess whether observed relationships between modifiable factors and depression would be

robust to potential confounding in these domains. Here, we sought to include covariates previously linked to mental health that may not be readily modifiable.

### **Data Cleaning and Processing**

As summarized in **Table S1a**, we performed initial data processing of all exposure variables where relevant, excluding those that were missing for >20% of the sample. The dataset included multiple-choice categorical variables that were provided in array format based on the number of available choices (e.g., different types of activity) that were dummy coded into separate binary variables (i.e., yes/no for a given type of activity, assigning NA to those missing on the top-level array variable). For continuous variables where a coding option of -10 indicated a value of less than 1 (e.g., less than one hour per day), we recoded this response to 0.5 to approximate less than 1 but greater than 0; substantive results were largely unchanged when recoding more conservatively to 0 (not shown). Some factor variables were recoded to reflect rational categories and/or a logical ordinal progression, where responses of increasing quantity were organized in ascending order. After these initial processing steps, negative values (e.g., -1 for “do not know”, -3 for “prefer not to answer”) indicated items that participants did not answer and were thus set as missing for all remaining variables, except the Townsend deprivation index which was scaled across negative and positive values. Continuous variables were standardized with mean=0 and SD=1 for analysis.

### **Polygenic Scoring**

Because PRS-CS (available as a Python package via <https://github.com/getian107/PRScs>) allows multivariate modeling of local LD patterns and can accommodate a range of underlying

genetic architectures while preserving all SNPs for scoring, it generally demonstrates increased explanatory power compared to conventional and other Bayesian methods, particularly when using a large discovery GWAS<sup>3</sup>.

### **Distribution of PRS-CS polygenic scores in the full analytic sample**

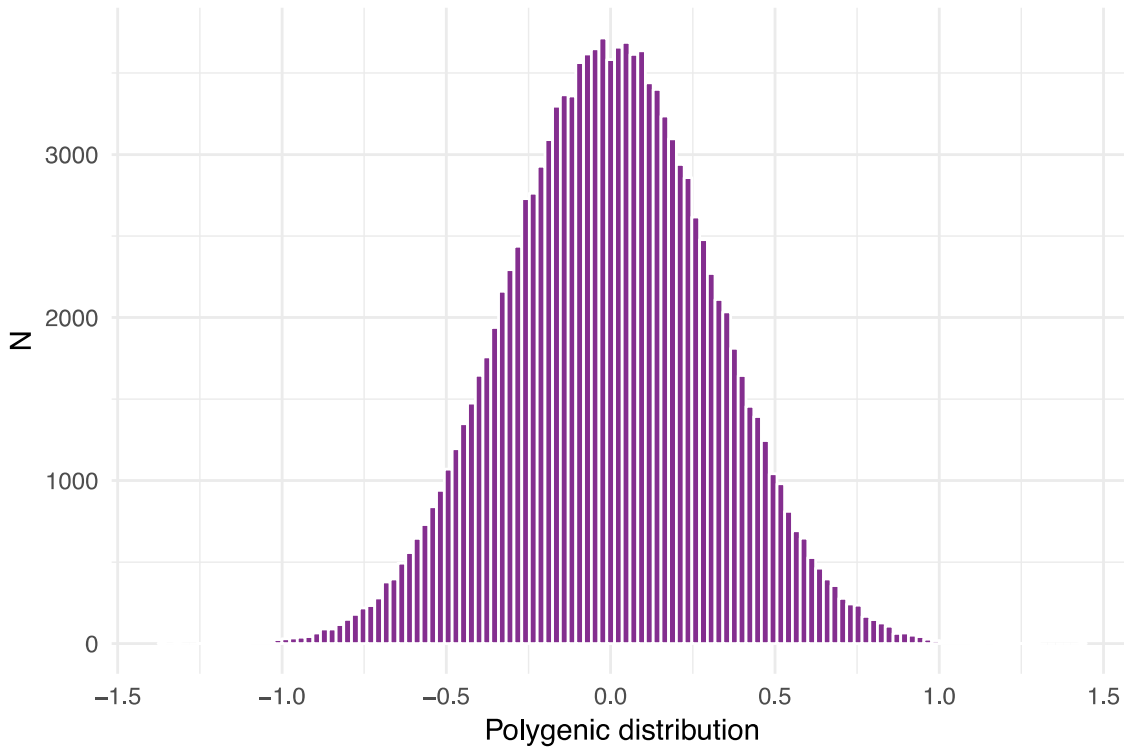

For comparison with the PRS-CS method (see standardized distribution above and Methods in main manuscript), conventional clumping and thresholding procedures for polygenic risk scoring were performed using PRSice2 software. The below figures show PRSice2 estimates of explanatory  $R^2$  of PRS across varying p-value thresholds in relation to follow-up depression, and well as distribution of the standardized PRS at the p-value threshold selected with highest explanatory  $R^2$ . Despite selecting the p-value threshold with highest explanatory  $R^2$ , the odds ratio associated with the standardized conventional PRS (1.22) was slightly lower than for the standardized PRS-CS score (1.33) for follow-up depression.

## Explanatory variance of conventional PRS across p-value thresholds in relation to follow-up depression

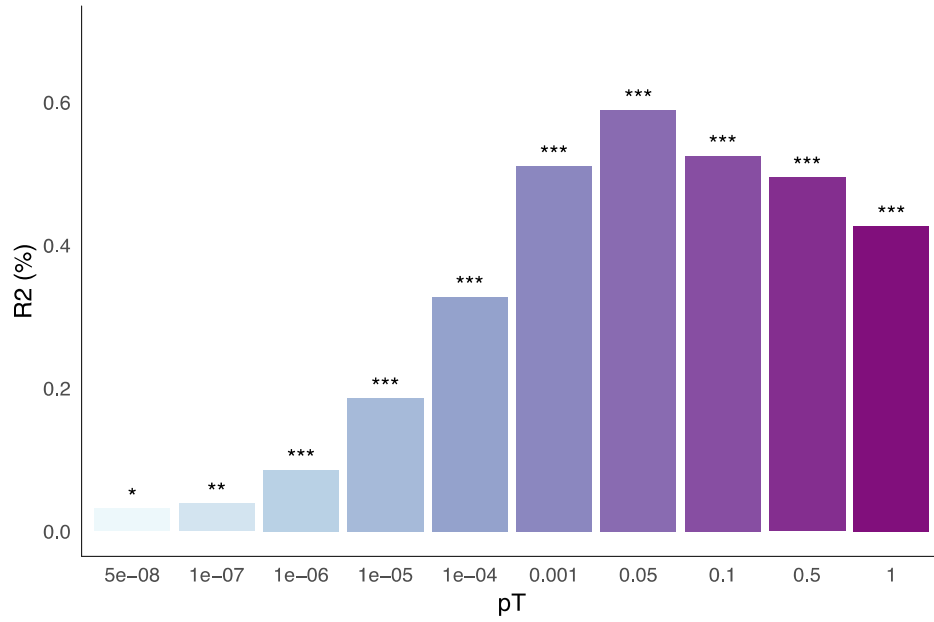

## Distribution of scores for the top conventional PRS (pT=0.05)

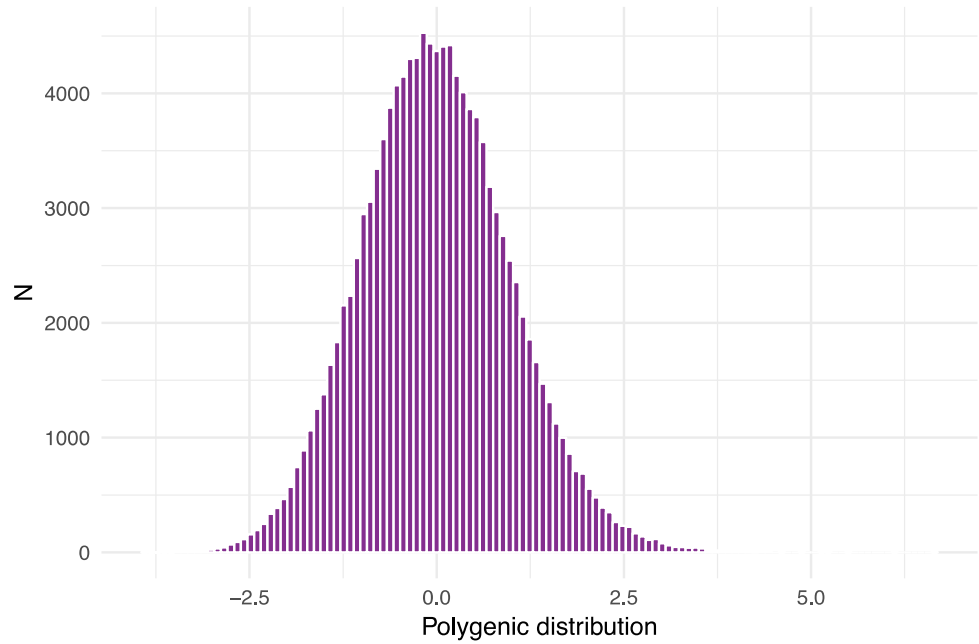

## **Stratifying Participants Based on Polygenic Risk and Reported Traumatic Life Events**

As described in the main Methods, we randomly sampled a holdout training sample of 1,000 participants with an even (50:50) split of cases and controls for follow-up depression. The rationale for a holdout sample of this size and case distribution was to derive predicted probabilities using the available risk factors in a smaller group of individuals drawn from the same study population for comparability, with standard enrichment of potential depression cases to improve statistical power for estimating the effects of each risk factor, while preserving relatively large sample sizes for the resulting analytic samples. We tested separate logistic regression models using clinically significant follow-up depression as the (binary) outcome, and (a) polygenic risk or (b) the set of reported traumatic life events, as independent variables. This strategy of estimating relative influences of different reported traumatic life events on follow-up depression based on a hold-out sample represented an alternative to the conventional strategy of assuming all events contribute equally to depression risk, which also has limitations. We used the resulting raw model coefficients derived from this training sample as variable weights to estimate predicted probability scores for follow-up depression among participants in the remaining testing sample (n=112,589) based on (a) polygenic risk (PRS) or (b) the set of reported traumatic life events (TLE). The weights used for variables in each risk set are reported below, along with the distribution and the cut-off point for establishing the high PRS or high TLE groups. As expected, the prevalence of follow-up depression was elevated within the high PRS group (6.1%) and the high TLE group (12.1%).

## Predicted probability scores for polygenic risk and stratification point

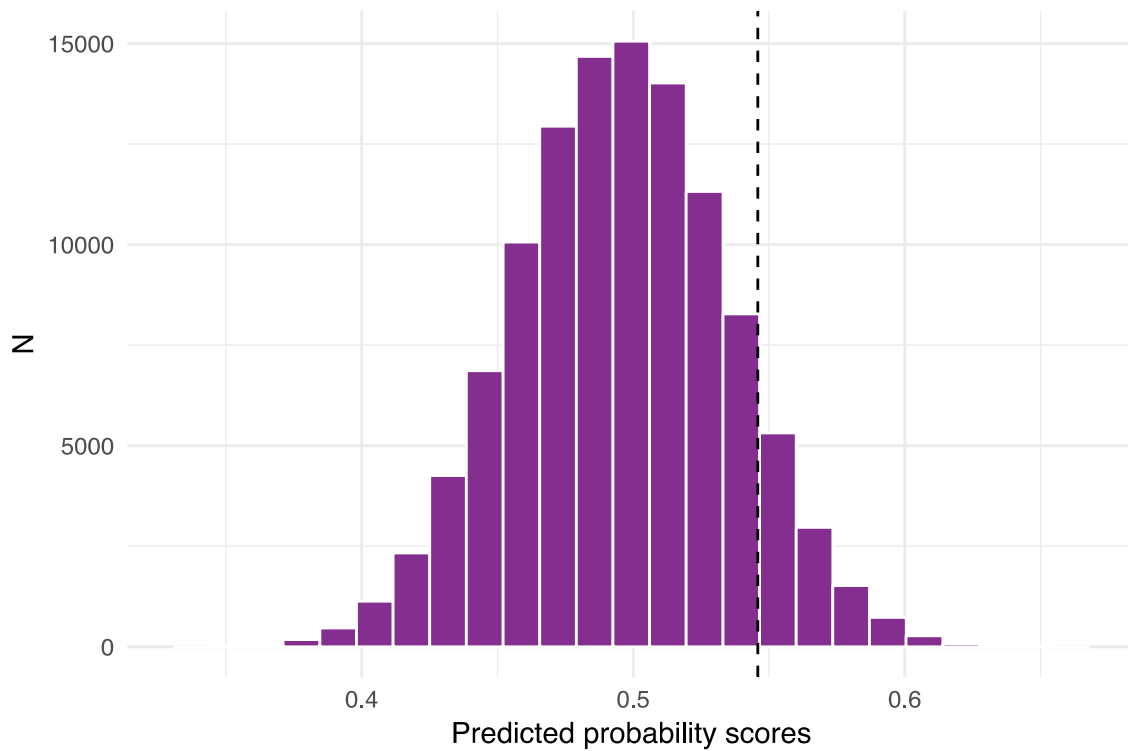

Predicted probability scores derived from training variable weights: Polygenic risk score (0.50521). Dashed line indicates cut-off point for establishing at-risk group (> 90th percentile).



## Predicted probability scores for traumatic life events and stratification point

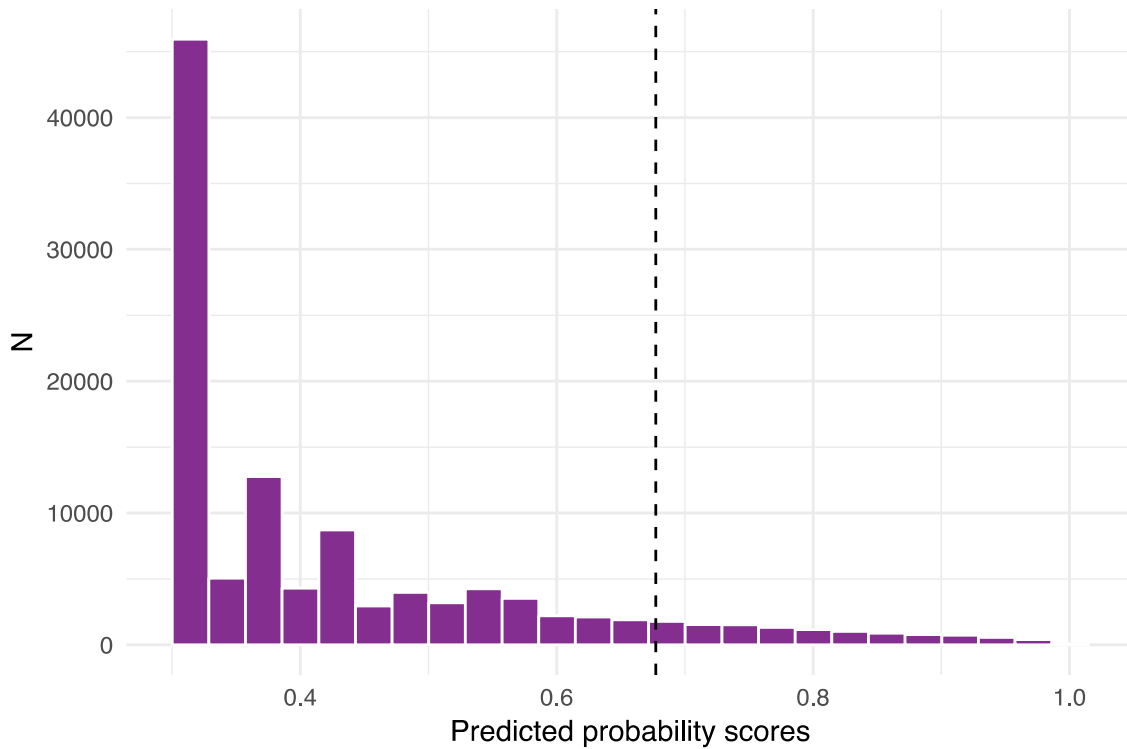

Predicted probability scores derived from training variable weights: Childhood physical abuse (0.10297), childhood emotional abuse (0.44026), childhood sexual abuse (0.10870), physical partner violence (0.07899), partner emotional abuse (0.48035), partner sexual interference (0.07791), lifetime exposure to sexual assault (0.32085), lifetime exposure to sudden violent crime (0.26452), life-threatening accident (0.49588), and witnessing sudden violent death (0.29127). Dashed line indicates cut-point for establishing at-risk group (> 90th percentile).

## **Exposure-Wide Association (EWAS) Analyses**

In the full sample, participants were 54% female and had a mean baseline age of 56.1 (standard deviation,  $SD = 7.7$ ). 46% reported college or university qualifications, 65% reported current paid or self-employment, and 64% reported average pre-tax household income of 31,000 pounds or higher. Participants had a mean BMI of 26.7 ( $SD = 4.4$ ) and 26% endorsed some physical illness/disability. Overall, 3.9% met the cut-off for clinically significant symptoms at follow-up. For further details, see **Table S1c**.

Univariate associations between each baseline factor and follow-up depression status, adjusting for an increasingly stringent set of covariates as summarized in the main Methods, were tested using the *PheWAS* R package. Association tests between specific factors (as predictor) and depression (as outcome) were performed using all available data, using a logistic regression framework due to the binary nature of the depression phenotype. Dichotomous exposure variables and covariates were entered as categorical predictors in each model, while non-dichotomous (continuous or ordinal) exposure variables and covariates were entered as predictors with linear assumptions. The analytic sample sizes for each tested association are summarized with all results in **Tables S2**.

## **Two-Sample Mendelian Randomization Analyses**

### **A. Genetic instruments**

In a two-sample MR design, instruments can be extracted from summary statistics of large-scale, non-overlapping genome-wide association studies (GWAS). We accessed the GWAS Atlas online database<sup>4</sup> (<https://atlas.ctglab.nl>) to obtain publicly available summary statistics for each UK Biobank-based factor that was identified in the fully adjusted univariate

association model for the full sample. GWAS Atlas summary statistics that were missing for five UK Biobank derived variables (i.e., meeting recommendations for moderate/vigorous/walking activity) were not tested in the MR framework; however, related traits (e.g., walking frequency) were examined as possible. GWAS Atlas summary statistics for binary variables were generated with odds ratio estimates (logistic), while summary statistics for other variables (continuous, ordinal) were generated with beta (linear) estimates. For depression, we retained the same set of summary statistics<sup>5</sup> for major depression used in previous steps for polygenic scoring in this sample. We clumped SNPs correlated at  $r^2 > .0001$  in a 1000 kb window for independence based on European ancestry reference data from the 1000 Genomes Project. For genetic instruments, we selected highly associated SNPs (discovery GWAS p-value  $< 5 \times 10^{-7}$ ) for the exposure of interest. Prior MR studies have used relaxed p-value thresholds for selecting the most strongly associated instruments when genome-wide significant SNPs are limited<sup>6,7</sup>. Some of the planned sensitivity analyses require at least three instrument SNPs, which would not be possible for some traits and would not allow us to assess whether results were robust. We therefore sought to consistently apply a threshold relaxed by one decimal point from genome-wide significance to provide a reasonable number of SNPs for most traits under consideration without being so inclusive to introduce excessive horizontal pleiotropy.

## **B. Additional details for MR analyses**

Using the *TwoSampleMR* package in R, we conducted MR analyses to estimate the effect of each modifiable factor on depression, and vice versa. The *TwoSampleMR* package harmonizes exposure and outcome datasets containing information on SNPs, alleles, effect sizes (odds ratios converted to betas via log transformation), standard errors, and p-values. In some cases, a modest

number of non-overlapping SNPs between exposure and outcome summary statistics could not be automatically queried for proxies and were not included in the analysis. In this study, ambiguous SNPs could not be inferred due to missing effect allele frequency information in GWAS Atlas summary statistics, and were therefore removed for analysis. Prior work has suggested that inclusion/exclusion of ambiguous SNPs does not substantively change MR results<sup>8</sup>. For significant MR results after statistical outlier removal, we further assessed horizontal pleiotropy using leave-one-SNP-out analyses (assessing the extent to which MR estimates are affected by the inclusion/exclusion of each instrument SNP); the modified Cochran's Q statistic (evaluating overall effect heterogeneity between instrument SNPs); and the MR Egger intercept test<sup>9</sup> (where a significant intercept deviation from the null suggests directional pleiotropy of SNP effects that could bias the IVW estimate).

For significant MR results, we also searched each instrument SNP in the PhenoScanner v2 database (<http://www.phenoscaner.medschl.cam.ac.uk>; last accessed February 2020) to identify cross-associations with any other phenotypes including depression-related traits at  $p < 1 \times 10^{-5}$  with each instrument SNP or any SNPs in linkage disequilibrium at  $r^2 > 0.80$ , and assessed whether removing these SNPs substantively changed the pattern of results, as reported in **Tables S5a-d**. This is a relatively conservative approach as some of these phenotypes may lie on the same causal pathway (i.e., represent vertical pleiotropy, which is non-problematic for MR assumptions) but in order not to make arbitrary discriminations, we retained SNPs with no currently known cross-associations.

Additionally, as an index of instrument strength, mean F statistics were calculated for the set of genetic instruments for each modifiable factor (**Table S4e**), where  $F = \beta^2 / \text{se}^2$  for each exposure-related SNP. A mean F statistic of  $> 10$  has been posited as a rule of thumb for

adequate instrument strength<sup>10</sup>. Finally, for descriptive purposes, LD score regression-based genetic correlations were extracted from the GWAS Atlas database between modifiable factors that were at least nominally significant in the MR (**Table S4f**).

### **C. Horizontal pleiotropy sensitivity analysis results for significant factors**

For confiding in others, no significant effect heterogeneity (Q statistic=5.5, p=0.78) was observed after removal of outliers, and the MR-PRESSO global test (p=0.82) and MR Egger intercept test (p=0.78) also did not provide evidence of horizontal pleiotropy. Given the lower number of SNPs tested, the IVW effect remained notably significant when relaxing the instrument SNP p-value threshold to  $5 \times 10^{-6}$  (OR=0.89 [0.84-0.95], p=7.63E-4; 50 SNPs), and when retaining only SNPs with no known associations in the PhenoScanner v2 database (**Table S4a**).

For TV use, no significant effect heterogeneity (Q statistic=130.8, p=0.78) was observed after removal of outliers, and the MR-PRESSO global test (p=0.79) and MR Egger intercept test (p=0.44) also did not provide evidence of horizontal pleiotropy. The IVW estimate remained significant when retaining only SNPs with no known associations in the PhenoScanner v2 database (**Table S4b**).

For daytime napping, no significant effect heterogeneity (Q statistic=85.1, p=0.63) was observed after removal of outliers, and the MR-PRESSO global test (p=0.64) and MR Egger intercept test (p=0.39) also did not provide evidence of horizontal pleiotropy. The IVW estimate remained significant when retaining only SNPs with no known associations in the PhenoScanner v2 database (**Table S4c**).

For multivitamin use, no significant effect heterogeneity (Q statistic=5.70, p=0.34) was observed after removal of outliers, and the MR-PRESSO global test (p=0.39) and MR Egger

intercept test ( $p=0.60$ ) also did not provide evidence of horizontal pleiotropy. However, the IVW estimate was not significant when retaining only SNPs with no known associations in the PhenoScanner v2 database (using the  $5 \times 10^{-6}$  threshold as the  $5 \times 10^{-7}$  did not have sufficient non-associated SNPs after removing any cross-associated SNPs) (**Table S4d**).

#### **D. Summary of nominal MR results**

Other MR findings were nominally significant at the traditional  $p < 0.05$  threshold (with consistent WM estimates unless otherwise noted; **Tables S3**)—which suggested potential beneficial effects of tea intake (IVW OR=0.95, 95% CI [0.91-0.99],  $p=1.63E-2$ ); more frequent social visits (IVW OR=0.79, 95% CI [0.65-0.96],  $p=1.80E-2$ ) and engaging in exercises like swimming and cycling (IVW OR=0.90, 95% CI [0.82-0.99],  $p=3.27E-2$ ; non-significant WM estimate though directionally consistent), as well as deleterious effects of salt intake (IVW OR=1.10, 95% CI [1.01,1.19],  $p=3.45E-2$ ) on the risk of depression.

We also observed nominal evidence in the reverse direction, suggesting depression may be associated with reduced gym/sports club use (IVW OR=0.93, 95% CI [0.88-0.98],  $p=7.10E-3$ ), attendance at pubs/social clubs (IVW OR=0.92, 95% CI [0.87-0.98],  $p=8.03E-3$ ), as well as increased computer use (IVW beta=0.05, 95% CI [0.01-0.09],  $p=7.97E-3$ ) and playing computer games (IVW beta=0.01, 95% CI [0.001-0.03],  $p=3.27E-2$ ; non-significant WM estimate), and supplementation not only with multivitamins (as noted earlier) but also vitamin B (IVW OR=1.14, 95% CI [1.02-1.27],  $p=1.89E-2$ ; non-significant WM estimate though directionally consistent). Although walking was phenotypically associated with reduced odds for depression, MR results suggested that depression may be nominally associated with increased tendency for walking, whether for pleasure or as a form of transportation (IVW OR=1.05, 95% CI [1.004-

1.11],  $p=3.61E-2$ , non-significant WM estimate though directionally consistent; IVW OR=1.06, 95% CI [1.009-1.11],  $p=1.87E-2$ , respectively).

## References

1. Bycroft C, Freeman C, Petkova D, et al. The UK Biobank resource with deep phenotyping and genomic data. *Nature*. 2018;562(7726):203-209. doi:10.1038/s41586-018-0579-z
2. Bernstein DP, Stein JA, Newcomb MD, et al. Development and validation of a brief screening version of the Childhood Trauma Questionnaire. *Child Abuse Negl*. 2003;27(2):169-190.
3. Ge T, Chen C-Y, Ni Y, Feng Y-CA, Smoller JW. Polygenic prediction via Bayesian regression and continuous shrinkage priors. *Nature Communications*. 2019;10(1). doi:10.1038/s41467-019-09718-5
4. Watanabe K, Stringer S, Frei O, et al. A global overview of pleiotropy and genetic architecture in complex traits. *Nature Genetics*. 2019;51(9):1339-1348. doi:10.1038/s41588-019-0481-0
5. Wray NR, eQTLGen, 23andMe, et al. Genome-wide association analyses identify 44 risk variants and refine the genetic architecture of major depression. *Nature Genetics*. 2018;50(5):668-681. doi:10.1038/s41588-018-0090-3
6. Gage SH, Jones HJ, Burgess S, et al. Assessing causality in associations between cannabis use and schizophrenia risk: a two-sample Mendelian randomization study. *Psychological Medicine*. 2017;47(05):971-980. doi:10.1017/S0033291716003172
7. Hartwig FP, Borges MC, Horta BL, Bowden J, Davey Smith G. Inflammatory Biomarkers and Risk of Schizophrenia: A 2-Sample Mendelian Randomization Study. *JAMA Psychiatry*. 2017;74(12):1226. doi:10.1001/jamapsychiatry.2017.3191
8. Choi K, Chen C-Y, Stein M, et al. Testing Causal Bidirectional Influences between Physical Activity and Depression using Mendelian Randomization. July 2018. doi:10.1101/364232
9. Burgess S, Thompson SG. Interpreting findings from Mendelian randomization using the MR-Egger method. *European Journal of Epidemiology*. 2017;32(5):377-389. doi:10.1007/s10654-017-0255-x
10. Burgess S, Butterworth A, Thompson SG. Mendelian Randomization Analysis With Multiple Genetic Variants Using Summarized Data: Mendelian Randomization Using Summarized Data. *Genetic Epidemiology*. 2013;37(7):658-665. doi:10.1002/gepi.21758



**Members and Affiliations of the Major Depressive Disorder Working Group  
of the Psychiatric Genomics Consortium**

|                                        |                                 |                                     |
|----------------------------------------|---------------------------------|-------------------------------------|
| Naomi R Wray* 1, 2                     | Jakob Grove 8, 13, 24, 51       | Jodie N Painter 29                  |
| Stephan Ripke* 3, 4, 5                 | Lynsey S Hall 10, 52            | Carsten Bøcker Pedersen 11, 12, 13  |
| Manuel Mattheisen* 6, 7, 8             | Christine Søholm Hansen 13, 18  | Marianne Giørtz Pedersen 11, 12, 13 |
| Maciej Trzaskowski 1                   | Thomas F Hansen 53, 54, 55      | Roseann E Peterson 17, 85           |
| Enda M Byrne 1                         | Stefan Herms 35, 47             | Erik Pettersson 22                  |
| Abdel Abdellaoui 9                     | Ian B Hickie 56                 | Wouter J Peyrot 19                  |
| Mark J Adams 10                        | Per Hoffmann 35, 47             | Giorgio Pistis 27                   |
| Esben Agerbo 11, 12, 13                | Georg Homuth 57                 | Danielle Posthuma 86, 87            |
| Tracy M Air 14                         | Carsten Horn 58                 | Jorge A Quiroz 88                   |
| Till F M Andlauer 15, 16               | Jouke-Jan Hottenga 9            | Per Qvist 8, 13, 24                 |
| Silviu-Alin Bacanu 17                  | David M Hougaard 13,18          | John P Rice 89                      |
| Marie Bækvad-Hansen 13, 18             | David M Howard 10, 28           | Brien P. Riley 17                   |
| Aartjan T F Beekman 19                 | Marcus Ising 59                 | Margarita Rivera 28, 90             |
| Tim B Bigdeli 17, 20                   | Rick Jansen 19                  | Saira Saeed Mirza 36                |
| Elisabeth B Binder 15, 21              | Ian Jones 60                    | Robert Schoevers 91                 |
| Julien Bryois 22                       | Lisa A Jones 61                 | Eva C Schulte 92, 93                |
| Henriette N Buttenschøn 13, 23, 24     | Eric Jorgenson 62               | Ling Shen 62                        |
| Jonas Bybjerg-Grauholm 13, 18          | James A Knowles 63              | Jianxin Shi 94                      |
| Na Cai 25, 26                          | Isaac S Kohane 64, 65, 66       | Stanley I Shyn 95                   |
| Enrique Castela 27                     | Julia Kraft 4                   | Engilbert Sigurdsson 96             |
| Jane Hvarregaard Christensen 8, 13, 24 | Warren W. Kretschmar 67         | Grant C B Sinnamon 97               |
| Toni-Kim Clarke 10                     | Zoltán Kutalik 68, 69           | Johannes H Smit 19                  |
| Jonathan R I Coleman 28                | Yihan Li 67                     | Daniel J Smith 98                   |
| Lucía Colodro-Conde 29                 | Penelope A Lind 29              | Hreinn Stefansson 99                |
| Baptiste Couvy-Duchesne 2, 30          | Donald J MacIntyre 70, 71       | Stacy Steinberg 99                  |
| Nick Craddock 31                       | Dean F MacKinnon 50             | Fabian Streit 45                    |
| Gregory E Crawford 32, 33              | Robert M Maier 2                | Jana Strohmaier 45                  |
| Gail Davies 34                         | Wolfgang Maier 72               | Katherine E Tansey 100              |
| Ian J Deary 34                         | Jonathan Marchini 73            | Henning Teismann 101                |
| Franziska Degenhardt 35                | Hamdi Mbarek 9                  | Alexander Teumer 102                |
| Eske M Derks 29                        | Patrick McGrath 74              | Wesley Thompson 13, 54, 103, 104    |
| Nese Direk 36, 37                      | Peter McGuffin 28               | Pippa A Thomson 105                 |
| Conor V Dolan 9                        | Sarah E Medland 29              | Thorgeir E Thorgeirsson 99          |
| Erin C Dunn 38, 39, 40                 | Divya Mehta 2, 75               | Matthew Traylor 106                 |
| Thalia C Eley 28                       | Christel M Middeldorp 9, 76, 77 | Jens Treutlein 45                   |
| Valentina Escott-Price 41              | Evelin Mihailov 78              | Vassily Trubetsky 4                 |
| Farnush Farhadi Hassan Kiadeh 42       | Yuri Milaneschi 19              | Andrés G Uitterlinden 107           |
| Hilary K Finucane 43, 44               | Lili Milani 78                  | Daniel Umbricht 108                 |
| Jerome C Foo 45                        | Francis M Mondimore 50          | Sandra Van der Auwera 109           |
| Andreas J Forstner 35, 46, 47, 48      | Grant W Montgomery 1            | Albert M van Hemert 110             |
| Josef Frank 45                         | Sara Mostafavi 79, 80           | Alexander Viktorin 22               |
| Héléna A Gaspar 28                     | Niamh Mullins 28                | Peter M Visscher 1, 2               |
| Michael Gill 49                        | Matthias Nauck 81, 82           | Yunpeng Wang 13, 54, 104            |
| Fernando S Goes 50                     | Bernard Ng 80                   | Bradley T. Webb 111                 |
| Scott D Gordon 29                      | Michel G Nivard 9               | Shantel Marie Weinsheimer 13, 54    |
|                                        | Dale R Nyholt 83                |                                     |
|                                        | Paul F O'Reilly 28              |                                     |
|                                        | Hogni Oskarsson 84              |                                     |
|                                        | Michael J Owen 60               |                                     |

Jürgen Wellmann 101  
 Gonneke Willemsen 9  
 Stephanie H Witt 45  
 Yang Wu 1  
 Hualin S Xi 112  
 Jian Yang 2, 113  
 Futao Zhang 1  
 Volker Arolt 114  
 Bernhard T Baune 115, 116, 117  
 Klaus Berger 101  
 Dorret I Boomsma 9  
 Sven Cichon 35, 47, 118, 119  
 Udo Dannlowski 114  
 EJC de Geus 9, 120  
 J Raymond DePaulo 50  
 Enrico Domenici 121  
 Katharina Domschke 122, 123  
 Tõnu Esko 5, 78  
 Hans J Grabe 109  
 Steven P Hamilton 124  
 Caroline Hayward 125  
 Andrew C Heath 89  
 Kenneth S Kendler 17  
 Stefan Kloiber 59, 126, 127  
 Glyn Lewis 128  
 Qingqin S Li 129  
 Susanne Lucae 59  
 Pamela AF Madden 89  
 Patrik K Magnusson 22  
 Nicholas G Martin 29  
 Andrew M McIntosh 10, 34  
 Andres Metspalu 78, 130  
 Ole Mors 13, 131  
 Preben Bo Mortensen 11, 12,  
 13, 24  
 Bertram Müller-Myhsok 15,  
 132, 133  
 Merete Nordentoft 13, 134  
 Markus M Nöthen 35  
 Michael C O'Donovan 60  
 Sara A Paciga 135  
 Nancy L Pedersen 22  
 Brenda WJH Penninx 19  
 Roy H Perlis 38, 136  
 David J Porteous 105  
 James B Potash 137  
 Martin Preisig 27  
 Marcella Rietschel 45  
 Catherine Schaefer 62  
 Thomas G Schulze 45, 93, 138,  
 139, 140  
 Jordan W Smoller 38, 39, 40  
 Kari Stefansson 99, 141  
 Henning Tiemeier 36, 142, 143  
 Rudolf Uher 144  
 Henry Völzke 102  
 Myrna M Weissman 74, 145  
 Thomas Werge 13, 54, 146  
 Cathryn M Lewis\* 28, 147  
 Douglas F Levinson\* 148  
 Gerome Breen\* 28, 149  
 Anders D Børglum\* 8, 13, 24  
 Patrick F Sullivan\* 22, 150, 151,

- 1, Institute for Molecular Bioscience, The University of Queensland, Brisbane, QLD, AU
- 2, Queensland Brain Institute, The University of Queensland, Brisbane, QLD, AU
- 3, Analytic and Translational Genetics Unit, Massachusetts General Hospital, Boston, MA, US
- 4, Department of Psychiatry and Psychotherapy, Universitätsmedizin Berlin Campus Charité Mitte, Berlin, DE
- 5, Medical and Population Genetics, Broad Institute, Cambridge, MA, US
- 6, Department of Psychiatry, Psychosomatics and Psychotherapy, University of Wurzburg, Wurzburg, DE
- 7, Centre for Psychiatry Research, Department of Clinical Neuroscience, Karolinska Institutet, Stockholm, SE
- 8, Department of Biomedicine, Aarhus University, Aarhus, DK
- 9, Dept of Biological Psychology & EMGO+ Institute for Health and Care Research, Vrije Universiteit Amsterdam, Amsterdam, NL
- 10, Division of Psychiatry, University of Edinburgh, Edinburgh, GB
- 11, Centre for Integrated Register-based Research, Aarhus University, Aarhus, DK
- 12, National Centre for Register-Based Research, Aarhus University, Aarhus, DK
- 13, iPSYCH, The Lundbeck Foundation Initiative for Integrative Psychiatric Research,, DK
- 14, Discipline of Psychiatry, University of Adelaide, Adelaide, SA, AU
- 15, Department of Translational Research in Psychiatry, Max Planck Institute of Psychiatry, Munich, DE
- 16, Department of Neurology, Klinikum rechts der Isar, Technical University of Munich, Munich, DE
- 17, Department of Psychiatry, Virginia Commonwealth University, Richmond, VA, US
- 18, Center for Neonatal Screening, Department for Congenital Disorders, Statens Serum Institut, Copenhagen, DK
- 19, Department of Psychiatry, Vrije Universiteit Medical Center and GGZ inGeest, Amsterdam, NL
- 20, Virginia Institute for Psychiatric and Behavior Genetics, Richmond, VA, US
- 21, Department of Psychiatry and Behavioral Sciences, Emory University School of Medicine, Atlanta, GA, US
- 22, Department of Medical Epidemiology and Biostatistics, Karolinska Institutet, Stockholm, SE
- 23, Department of Clinical Medicine, Translational Neuropsychiatry Unit, Aarhus University, Aarhus, DK
- 24, iSEQ, Centre for Integrative Sequencing, Aarhus University, Aarhus, DK
- 25, Human Genetics, Wellcome Trust Sanger Institute, Cambridge, GB
- 26, Statistical genomics and systems genetics, European Bioinformatics Institute (EMBL-EBI), Cambridge, GB
- 27, Department of Psychiatry, Lausanne University Hospital and University of Lausanne, Lausanne, CH
- 28, Social, Genetic and Developmental Psychiatry Centre, King's College London, London, GB
- 29, Genetics and Computational Biology, QIMR Berghofer Medical Research Institute, Brisbane, QLD, AU
- 30, Centre for Advanced Imaging, The University of Queensland, Brisbane, QLD, AU
- 31, Psychological Medicine, Cardiff University, Cardiff, GB
- 32, Center for Genomic and Computational Biology, Duke University, Durham, NC, US
- 33, Department of Pediatrics, Division of Medical Genetics, Duke University, Durham, NC, US
- 34, Centre for Cognitive Ageing and Cognitive Epidemiology, University of Edinburgh, Edinburgh, GB
- 35, Institute of Human Genetics, University of Bonn, School of Medicine & University Hospital Bonn, Bonn, DE
- 36, Epidemiology, Erasmus MC, Rotterdam, Zuid-Holland, NL
- 37, Psychiatry, Dokuz Eylul University School Of Medicine, Izmir, TR
- 38, Department of Psychiatry, Massachusetts General Hospital, Boston, MA, US
- 39, Psychiatric and Neurodevelopmental Genetics Unit (PNGU), Massachusetts General Hospital, Boston, MA, US
- 40, Stanley Center for Psychiatric Research, Broad Institute, Cambridge, MA, US
- 41, Neuroscience and Mental Health, Cardiff University, Cardiff, GB
- 42, Bioinformatics, University of British Columbia, Vancouver, BC, CA
- 43, Department of Epidemiology, Harvard T.H. Chan School of Public Health, Boston, MA, US
- 44, Department of Mathematics, Massachusetts Institute of Technology, Cambridge, MA, US
- 45, Department of Genetic Epidemiology in Psychiatry, Central Institute of Mental Health, Medical Faculty Mannheim, Heidelberg University, Mannheim, Baden-Württemberg, DE
- 46, Department of Psychiatry (UPK), University of Basel, Basel, CH
- 47, Department of Biomedicine, University of Basel, Basel, CH
- 48, Centre for Human Genetics, University of Marburg, Marburg, DE
- 49, Department of Psychiatry, Trinity College Dublin, Dublin, IE
- 50, Psychiatry & Behavioral Sciences, Johns Hopkins University, Baltimore, MD, US

51, Bioinformatics Research Centre, Aarhus University, Aarhus, DK  
52, Institute of Genetic Medicine, Newcastle University, Newcastle upon Tyne, GB  
53, Danish Headache Centre, Department of Neurology, Rigshospitalet, Glostrup, DK  
54, Institute of Biological Psychiatry, Mental Health Center Sct. Hans, Mental Health Services Capital Region of Denmark, Copenhagen, DK  
55, iPSYCH, The Lundbeck Foundation Initiative for Psychiatric Research, Copenhagen, DK  
56, Brain and Mind Centre, University of Sydney, Sydney, NSW, AU  
57, Interfaculty Institute for Genetics and Functional Genomics, Department of Functional Genomics, University Medicine and Ernst Moritz Arndt University Greifswald, Greifswald, Mecklenburg-Vorpommern, DE  
58, Roche Pharmaceutical Research and Early Development, Pharmaceutical Sciences, Roche Innovation Center Basel, F. Hoffmann-La Roche Ltd, Basel, CH  
59, Max Planck Institute of Psychiatry, Munich, DE  
60, MRC Centre for Neuropsychiatric Genetics and Genomics, Cardiff University, Cardiff, GB  
61, Department of Psychological Medicine, University of Worcester, Worcester, GB  
62, Division of Research, Kaiser Permanente Northern California, Oakland, CA, US  
63, Psychiatry & The Behavioral Sciences, University of Southern California, Los Angeles, CA, US  
64, Department of Biomedical Informatics, Harvard Medical School, Boston, MA, US  
65, Department of Medicine, Brigham and Women's Hospital, Boston, MA, US  
66, Informatics Program, Boston Children's Hospital, Boston, MA, US  
67, Wellcome Trust Centre for Human Genetics, University of Oxford, Oxford, GB  
68, Institute of Social and Preventive Medicine (IUMSP), University Hospital of Lausanne, Lausanne, VD, CH  
69, Swiss Institute of Bioinformatics, Lausanne, VD, CH  
70, Division of Psychiatry, Centre for Clinical Brain Sciences, University of Edinburgh, Edinburgh, GB  
71, Mental Health, NHS 24, Glasgow, GB  
72, Department of Psychiatry and Psychotherapy, University of Bonn, Bonn, DE  
73, Statistics, University of Oxford, Oxford, GB  
74, Psychiatry, Columbia University College of Physicians and Surgeons, New York, NY, US  
75, School of Psychology and Counseling, Queensland University of Technology, Brisbane, QLD, AU  
76, Child and Youth Mental Health Service, Children's Health Queensland Hospital and Health Service, South Brisbane, QLD, AU  
77, Child Health Research Centre, University of Queensland, Brisbane, QLD, AU  
78, Estonian Genome Center, University of Tartu, Tartu, EE  
79, Medical Genetics, University of British Columbia, Vancouver, BC, CA  
80, Statistics, University of British Columbia, Vancouver, BC, CA  
81, DZHK (German Centre for Cardiovascular Research), Partner Site Greifswald, University Medicine, University Medicine Greifswald, Greifswald, Mecklenburg-Vorpommern, DE  
82, Institute of Clinical Chemistry and Laboratory Medicine, University Medicine Greifswald, Greifswald, Mecklenburg-Vorpommern, DE  
83, Institute of Health and Biomedical Innovation, Queensland University of Technology, Brisbane, QLD, AU  
84, Humus, Reykjavik, IS  
85, Virginia Institute for Psychiatric & Behavioral Genetics, Virginia Commonwealth University, Richmond, VA, US  
86, Clinical Genetics, Vrije Universiteit Medical Center, Amsterdam, NL  
87, Complex Trait Genetics, Vrije Universiteit Amsterdam, Amsterdam, NL  
88, Solid Biosciences, Boston, MA, US  
89, Department of Psychiatry, Washington University in Saint Louis School of Medicine, Saint Louis, MO, US  
90, Department of Biochemistry and Molecular Biology II, Institute of Neurosciences, Biomedical Research Centre (CIBM), University of Granada, Granada, ES  
91, Department of Psychiatry, University of Groningen, University Medical Center Groningen, Groningen, NL  
92, Department of Psychiatry and Psychotherapy, University Hospital, Ludwig Maximilian University Munich, Munich, DE  
93, Institute of Psychiatric Phenomics and Genomics (IPPG), University Hospital, Ludwig Maximilian University Munich, Munich, DE  
94, Division of Cancer Epidemiology and Genetics, National Cancer Institute, Bethesda, MD, US

95, Behavioral Health Services, Kaiser Permanente Washington, Seattle, WA, US  
96, Faculty of Medicine, Department of Psychiatry, University of Iceland, Reykjavik, IS  
97, School of Medicine and Dentistry, James Cook University, Townsville, QLD, AU  
98, Institute of Health and Wellbeing, University of Glasgow, Glasgow, GB  
99, deCODE Genetics / Amgen, Reykjavik, IS  
100, College of Biomedical and Life Sciences, Cardiff University, Cardiff, GB  
101, Institute of Epidemiology and Social Medicine, University of Münster, Münster, Nordrhein-Westfalen, DE  
102, Institute for Community Medicine, University Medicine Greifswald, Greifswald, Mecklenburg-Vorpommern, DE  
103, Department of Psychiatry, University of California, San Diego, San Diego, CA, US  
104, KG Jebsen Centre for Psychosis Research, Norway Division of Mental Health and Addiction, Oslo University Hospital, Oslo, NO  
105, Medical Genetics Section, CGEM, IGMM, University of Edinburgh, Edinburgh, GB  
106, Clinical Neurosciences, University of Cambridge, Cambridge, GB  
107, Internal Medicine, Erasmus MC, Rotterdam, Zuid-Holland, NL  
108, Roche Pharmaceutical Research and Early Development, Neuroscience, Ophthalmology and Rare Diseases Discovery & Translational Medicine Area, Roche Innovation Center Basel, F. Hoffmann-La Roche Ltd, Basel, CH  
109, Department of Psychiatry and Psychotherapy, University Medicine Greifswald, Greifswald, Mecklenburg-Vorpommern, DE  
110, Department of Psychiatry, Leiden University Medical Center, Leiden, NL  
111, Virginia Institute for Psychiatric & Behavioral Genetics, Virginia Commonwealth University, Richmond, VA, US  
112, Computational Sciences Center of Emphasis, Pfizer Global Research and Development, Cambridge, MA, US  
113, Institute for Molecular Bioscience; Queensland Brain Institute, The University of Queensland, Brisbane, QLD, AU  
114, Department of Psychiatry, University of Münster, Münster, Nordrhein-Westfalen, DE  
115, Department of Psychiatry, University of Münster, Münster, DE  
116, Department of Psychiatry, Melbourne Medical School, University of Melbourne, Melbourne, AU  
117, Florey Institute for Neuroscience and Mental Health, University of Melbourne, Melbourne, AU  
118, Institute of Medical Genetics and Pathology, University Hospital Basel, University of Basel, Basel, CH  
119, Institute of Neuroscience and Medicine (INM-1), Research Center Juelich, Juelich, DE  
120, Amsterdam Public Health Institute, Vrije Universiteit Medical Center, Amsterdam, NL  
121, Centre for Integrative Biology, Università degli Studi di Trento, Trento, Trentino-Alto Adige, IT  
122, Department of Psychiatry and Psychotherapy, Medical Center - University of Freiburg, Faculty of Medicine, University of Freiburg, Freiburg, DE  
123, Center for NeuroModulation, Faculty of Medicine, University of Freiburg, Freiburg, DE  
124, Psychiatry, Kaiser Permanente Northern California, San Francisco, CA, US  
125, Medical Research Council Human Genetics Unit, Institute of Genetics and Molecular Medicine, University of Edinburgh, Edinburgh, GB  
126, Department of Psychiatry, University of Toronto, Toronto, ON, CA  
127, Centre for Addiction and Mental Health, Toronto, ON, CA  
128, Division of Psychiatry, University College London, London, GB  
129, Neuroscience Therapeutic Area, Janssen Research and Development, LLC, Titusville, NJ, US  
130, Institute of Molecular and Cell Biology, University of Tartu, Tartu, EE  
131, Psychosis Research Unit, Aarhus University Hospital, Risskov, Aarhus, DK  
132, Munich Cluster for Systems Neurology (SyNergy), Munich, DE  
133, University of Liverpool, Liverpool, GB  
134, Mental Health Center Copenhagen, Copenhagen University Hospital, Copenhagen, DK  
135, Human Genetics and Computational Biomedicine, Pfizer Global Research and Development, Groton, CT, US  
136, Psychiatry, Harvard Medical School, Boston, MA, US  
137, Psychiatry, University of Iowa, Iowa City, IA, US  
138, Department of Psychiatry and Behavioral Sciences, Johns Hopkins University, Baltimore, MD, US  
139, Department of Psychiatry and Psychotherapy, University Medical Center Göttingen, Goettingen, Niedersachsen, DE

140, Human Genetics Branch, NIMH Division of Intramural Research Programs, Bethesda, MD, US  
141, Faculty of Medicine, University of Iceland, Reykjavik, IS  
142, Child and Adolescent Psychiatry, Erasmus MC, Rotterdam, Zuid-Holland, NL  
143, Psychiatry, Erasmus MC, Rotterdam, Zuid-Holland, NL  
144, Psychiatry, Dalhousie University, Halifax, NS, CA  
145, Division of Epidemiology, New York State Psychiatric Institute, New York, NY, US  
146, Department of Clinical Medicine, University of Copenhagen, Copenhagen, DK  
147, Department of Medical & Molecular Genetics, King's College London, London, GB  
148, Psychiatry & Behavioral Sciences, Stanford University, Stanford, CA, US  
149, NIHR Maudsley Biomedical Research Centre, King's College London, London, GB  
150, Genetics, University of North Carolina at Chapel Hill, Chapel Hill, NC, US  
151, Psychiatry, University of North Carolina at Chapel Hill, Chapel Hill, NC, US
